# Supplementary material for: The Nuclear Receptor, RORγ, Regulates Pathways Necessary for Breast Cancer Metastasis
Source: PubMed Central journal article supplement — eBioMedicine. 2016 Feb 18;6:59–72. doi: 10.1016/j.ebiom.2016.02.028 (PMC4856749; doi:10.1016/j.ebiom.2016.02.028), 2016-02-18
Supplement: mmc1.pdf [file mmc1.pdf]

## Supplementary Figure 1

| Gene        | Sequence                                                   |
|-------------|------------------------------------------------------------|
| RPLP0       | F: AGATGCAGCAGATCCGCAT<br>R: GTGGTGATACCTAAAGCCTG          |
| RORy total  | F: TTTCCATGGTGCTCCAGTCC<br>R: CCAATGACGGGGTGATGTGA         |
| CXCR4       | F: TCAGTGGCCGACCTCCTCTT<br>R: CTTGGCCTCTGACTGTTGGT         |
| CXCL12      | F: GAAAGCCATGTTGCCAGAG<br>R: CTTCGGGTCAATGCACACT           |
| c-MET total | F: CCATCCAGTGTCTCCAGAAGTG<br>R: TTCCCAGTGATAACCAGTGTGTAG   |
| SOX9        | F: GAGCCCAGTCTGAAGAAGGA<br>R: GCTTGACGTGCGGCTTGTTT         |
| CD24        | F: CTCCTACCCACGCAGATTTATTC<br>R: AGAGTGAGACCACGAAGAGAC     |
| CD44 total  | F: TGCCGCTTTGCAGGTGTATT<br>R: CCGATGCTCAGAGCTTTCTCC        |
| CD44v6      | F: GAAGAAACAGCTACCCAGAAGGAACAG<br>R: GCCAAGAGGGATGCCAAGATG |
| linc00511   | F: AGGGGCGACTACTGTTACCT<br>R: AAGCAGCTGAGCGAAACTCT         |
| BRCA1       | F: CTCAAGGAACCAGGGATGAA<br>R: CGCTTCTCAGTGGTGTCAA          |
| BRCA2       | F: TTGGCTGATGGTGGATGGCTCATA<br>R: TTTGGATCCACACCTGGAGTGCA  |
| RAD51       | F: TTAAAAACCTTAAGTGCTGCAGC<br>R: GGATTATCTTGAGTTAGTCTTAGC  |
| FANCA       | F: GAGGTTCTTCAGTCATACCCTGA<br>R: TCTCTCTGCATCTGAACAGCA     |
| FANCC       | F: CCAGCCAGAGTTCTTTGAGG<br>R: CGAAGCCAGAGGCAGACTAC         |
| FANCD2      | F: CCCATCTGCTATGATGATGAA<br>R: CGTATTTGCTGAGGGGATATG       |
| FANCE       | F: GTGGAGATGACCCCTGAGAA<br>R: GTCAGCATGAGCTT GGCATA        |
| FANCG       | F: CTGTAGC TGCCACGTTTTGA<br>R: CACAGGCCTACCACCAATCT        |
