# Supplementary material for: The Nuclear Receptor, RORγ, Regulates Pathways Necessary for Breast Cancer Metastasis
Source: PubMed Central journal article supplement — eBioMedicine. 2016 Feb 18;6:59–72. doi: 10.1016/j.ebiom.2016.02.028 (PMC4856749; doi:10.1016/j.ebiom.2016.02.028), 2016-02-18

# Supplementary Figure 4

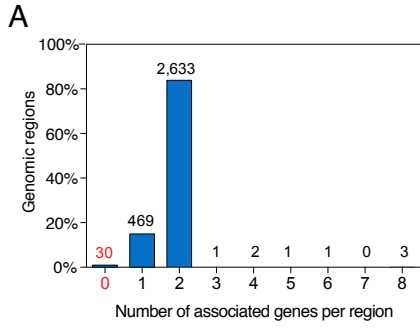

Basal+extension  
(constitutive 5.0 kb upstream and 1.0 kb downstream, up to 1000.0 kb max extension). Curated regulatory domains are included.

Total number of associations between region and gene:

$$5,781 = 469 \times 1 + 2,633 \times 2 + 1 \times 3 + 2 \times 4 + 1 \times 5 + 1 \times 6 + 0 \times 7 + 3 \times 8$$

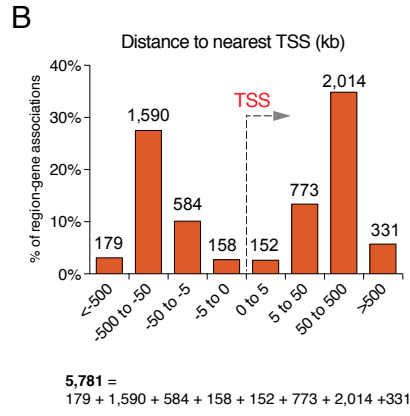

$$5,781 = 179 + 1,590 + 584 + 158 + 152 + 773 + 2,014 + 331$$

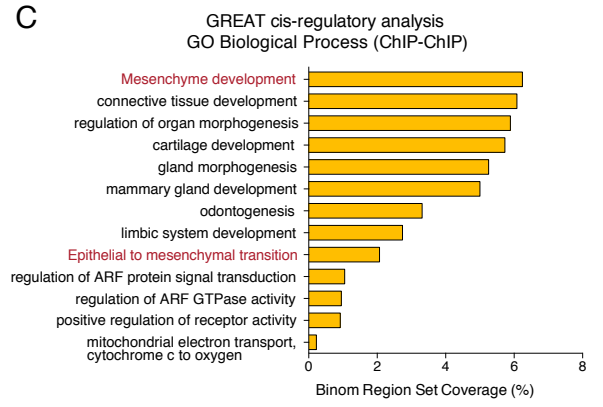

Supplement: mmc4.pdf [file mmc4.pdf]
