# Supplementary figures and images for: The Nuclear Receptor, RORγ, Regulates Pathways Necessary for Breast Cancer Metastasis
Source: PubMed Central journal article supplement — eBioMedicine. 2016 Feb 18;6:59–72. doi: 10.1016/j.ebiom.2016.02.028 (PMC4856749; doi:10.1016/j.ebiom.2016.02.028), 2016-02-18

# Supplementary Figure 2

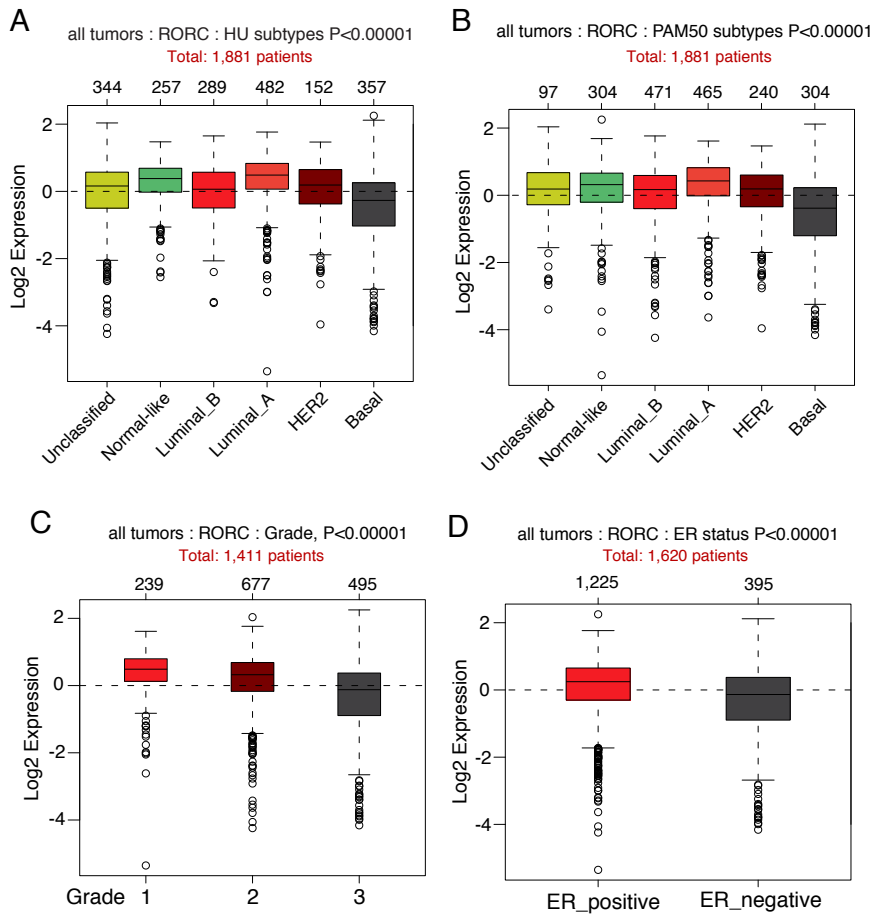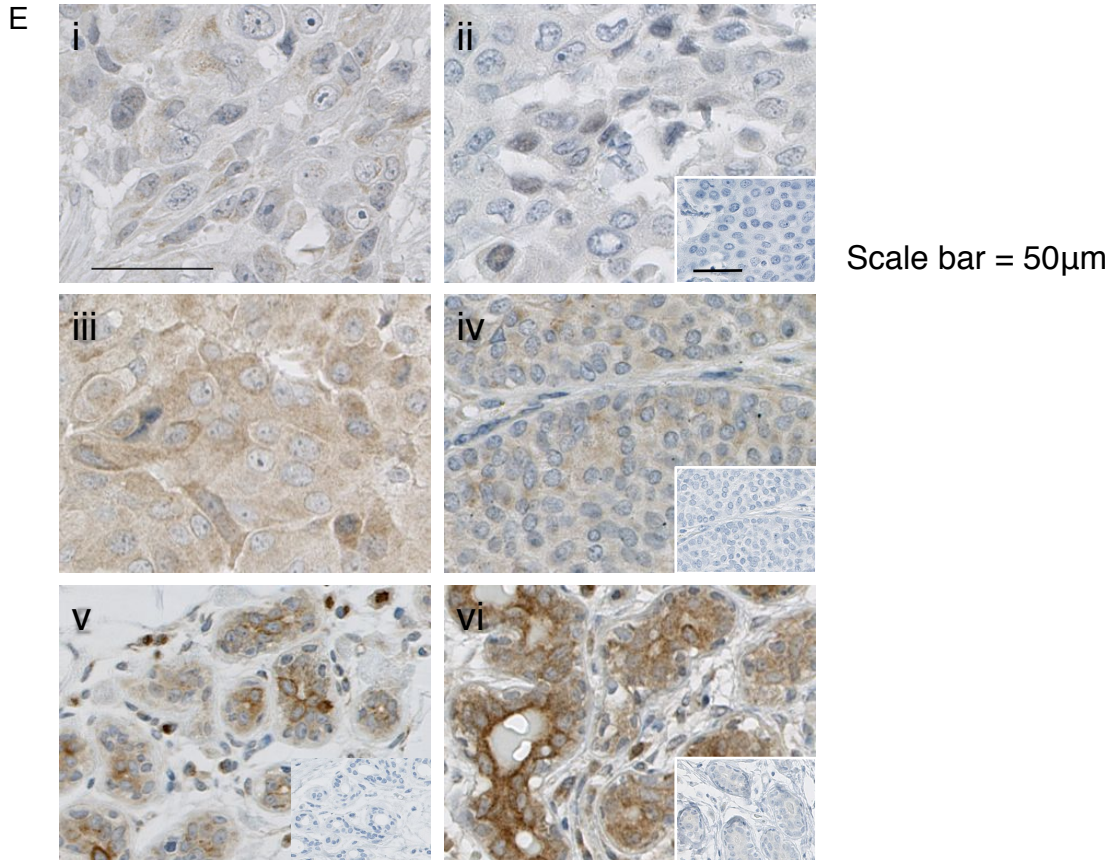

Supplement: mmc2.pdf [file mmc2.pdf]

# Supplementary Figure 3

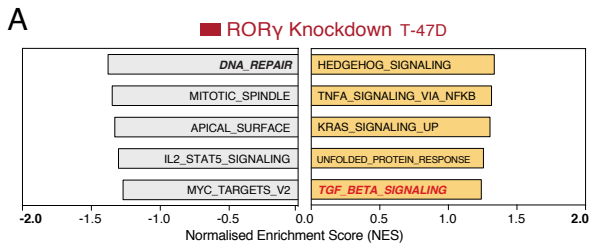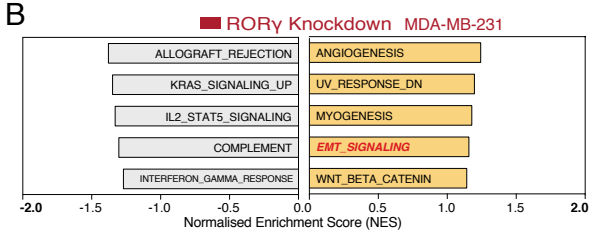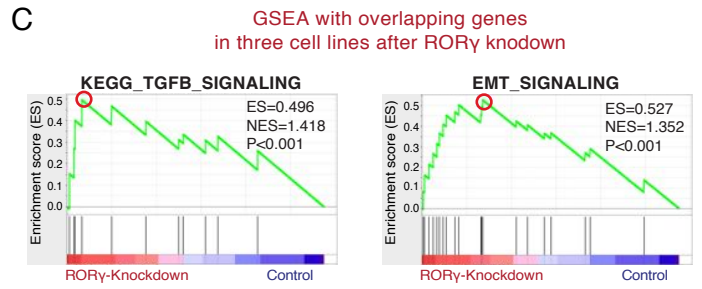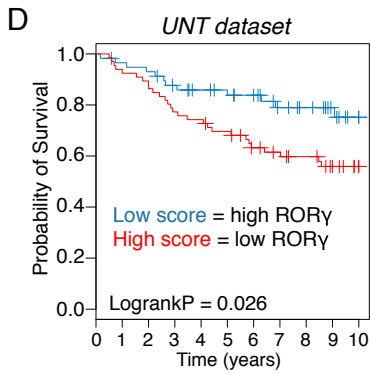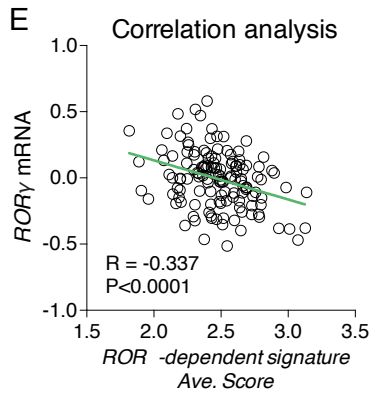

Supplement: mmc3.pdf [file mmc3.pdf]

# Supplementary Figure 5

## A Fanconi Anemia PPI pathway

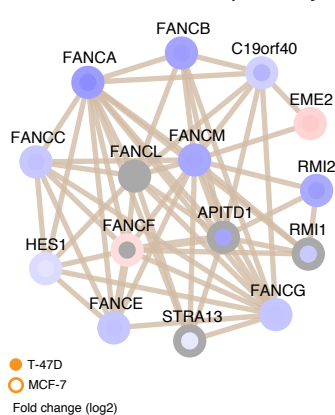

## B

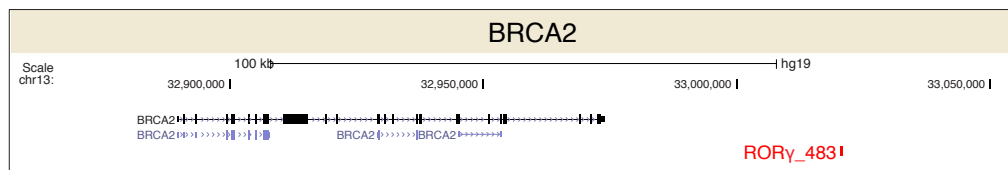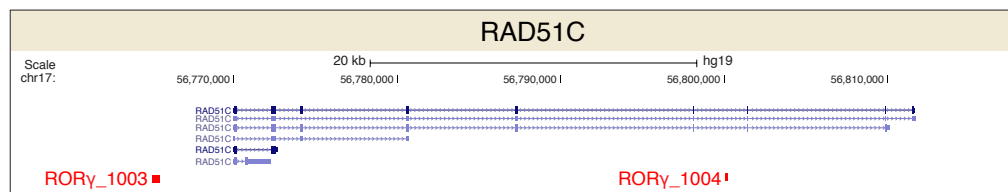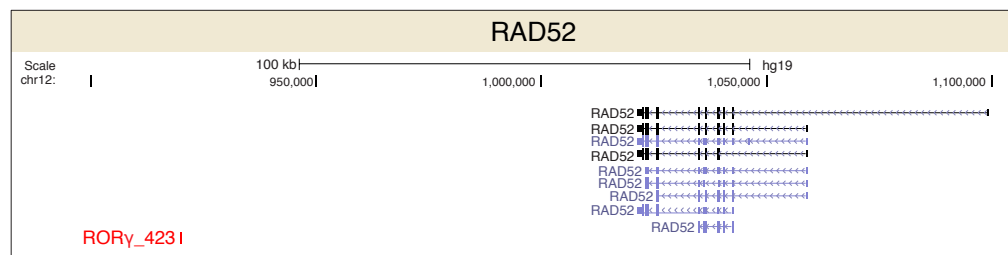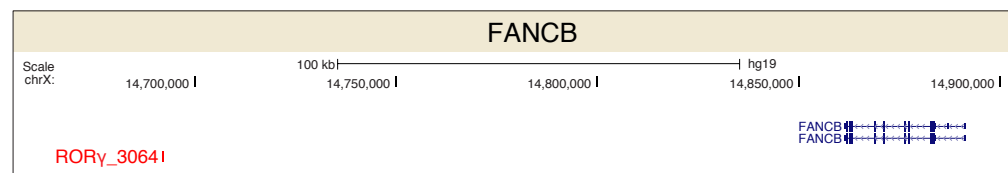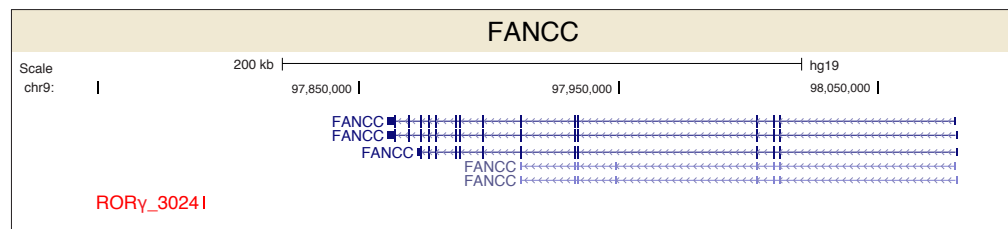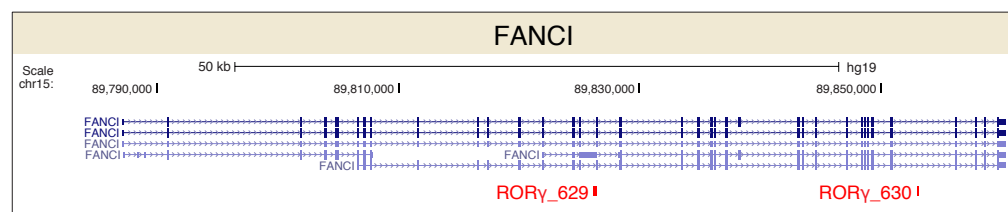

Supplement: mmc5.pdf [file mmc5.pdf]

# Supplementary Figure 6

DE genes between cell lines

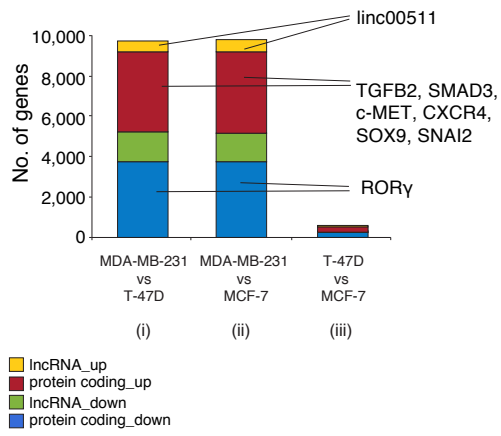

Supplement: mmc6.pdf [file mmc6.pdf]

# Supplementary Figure 7

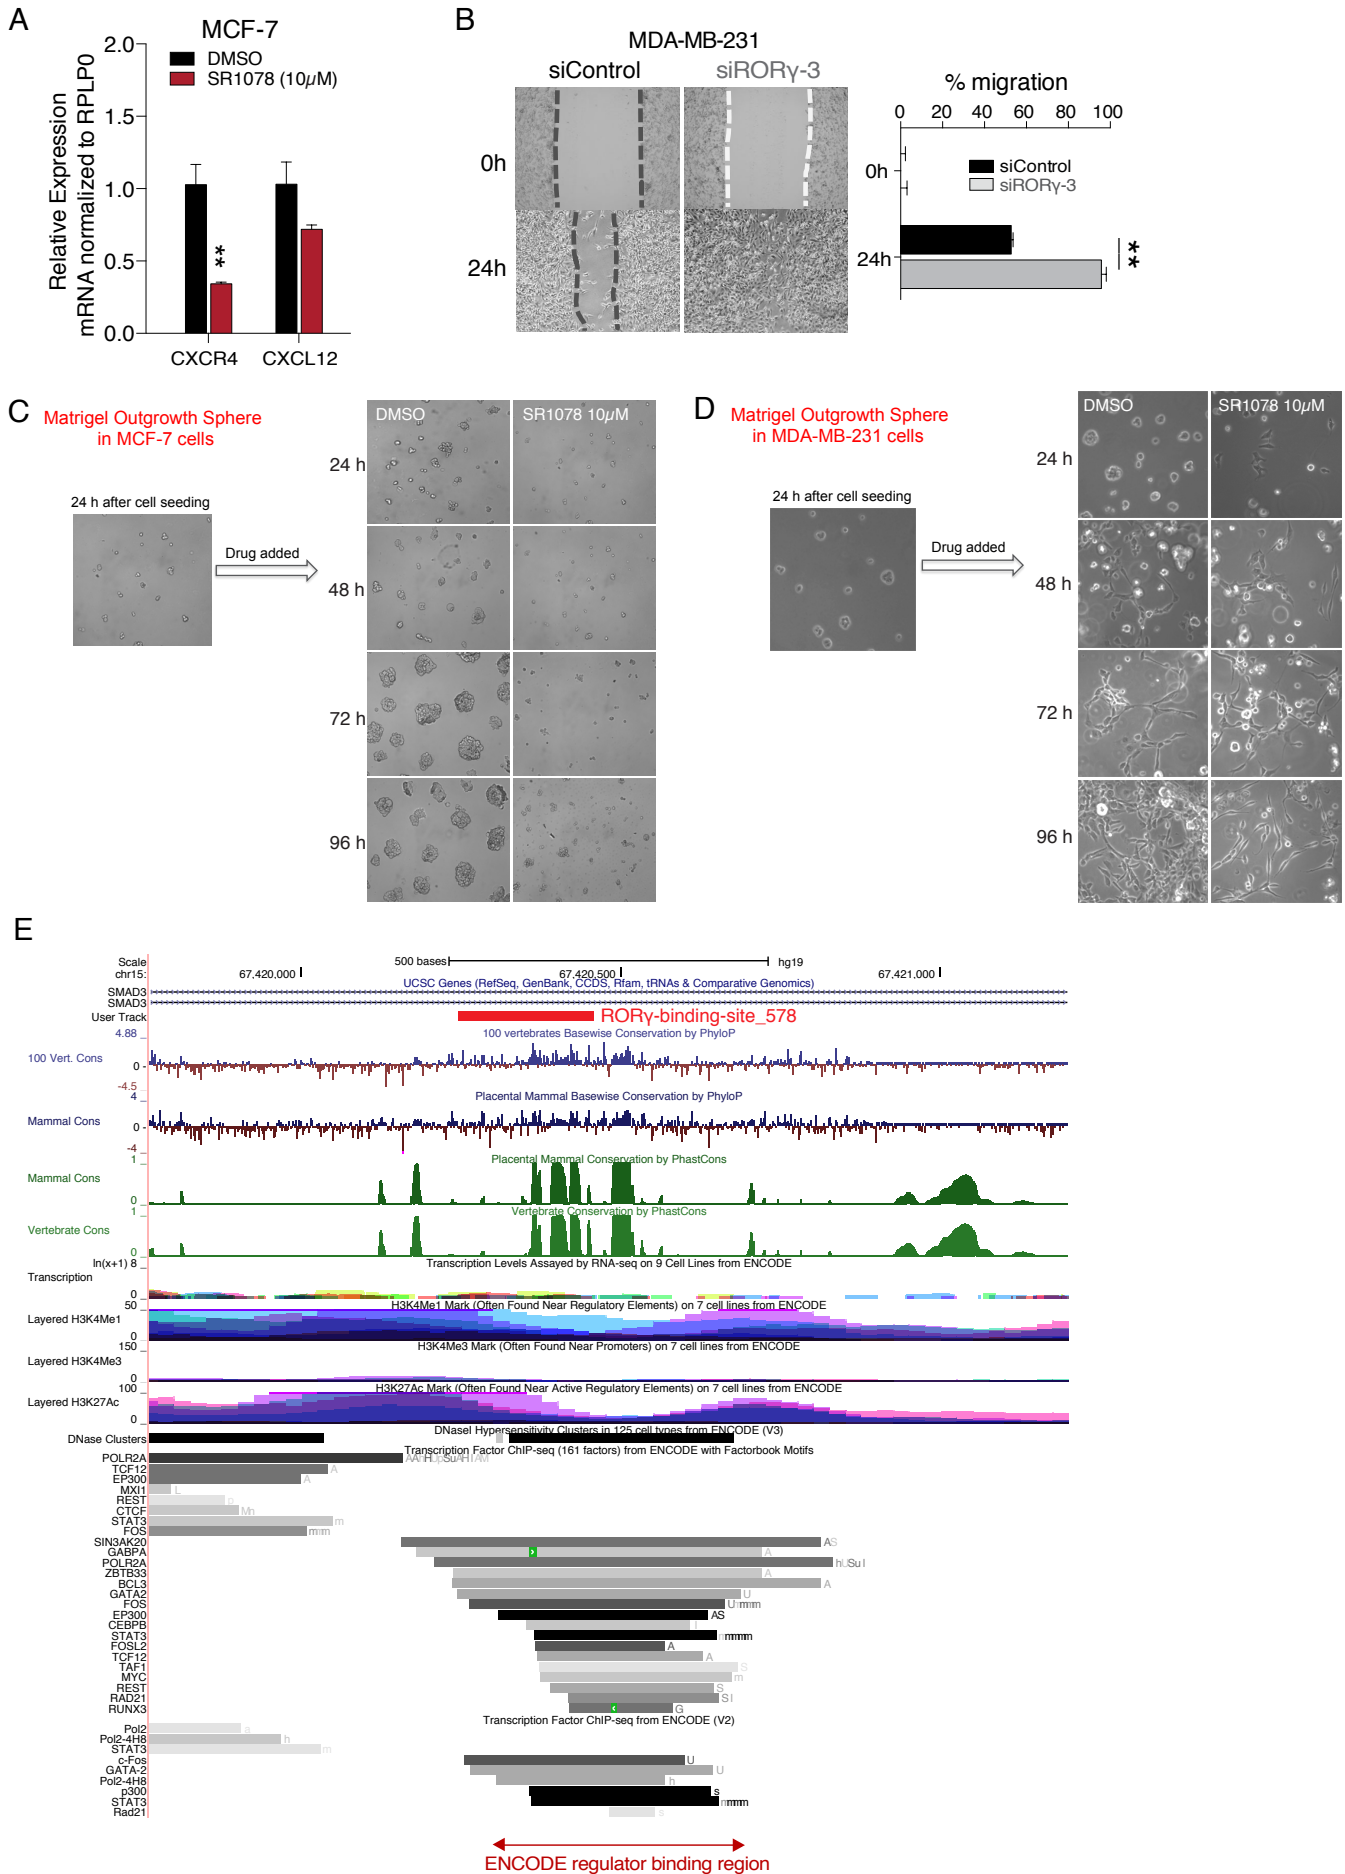

Supplement: mmc7.pdf [file mmc7.pdf]
